# Supplementary material
Source: Springer Nature journal article supplement (https://www.springermedizin.de/resource/supplementary/12889_2013_5700_MOESM2_ESM.pdf/9496026)
Supplement: MOESM2 [file 9496026]

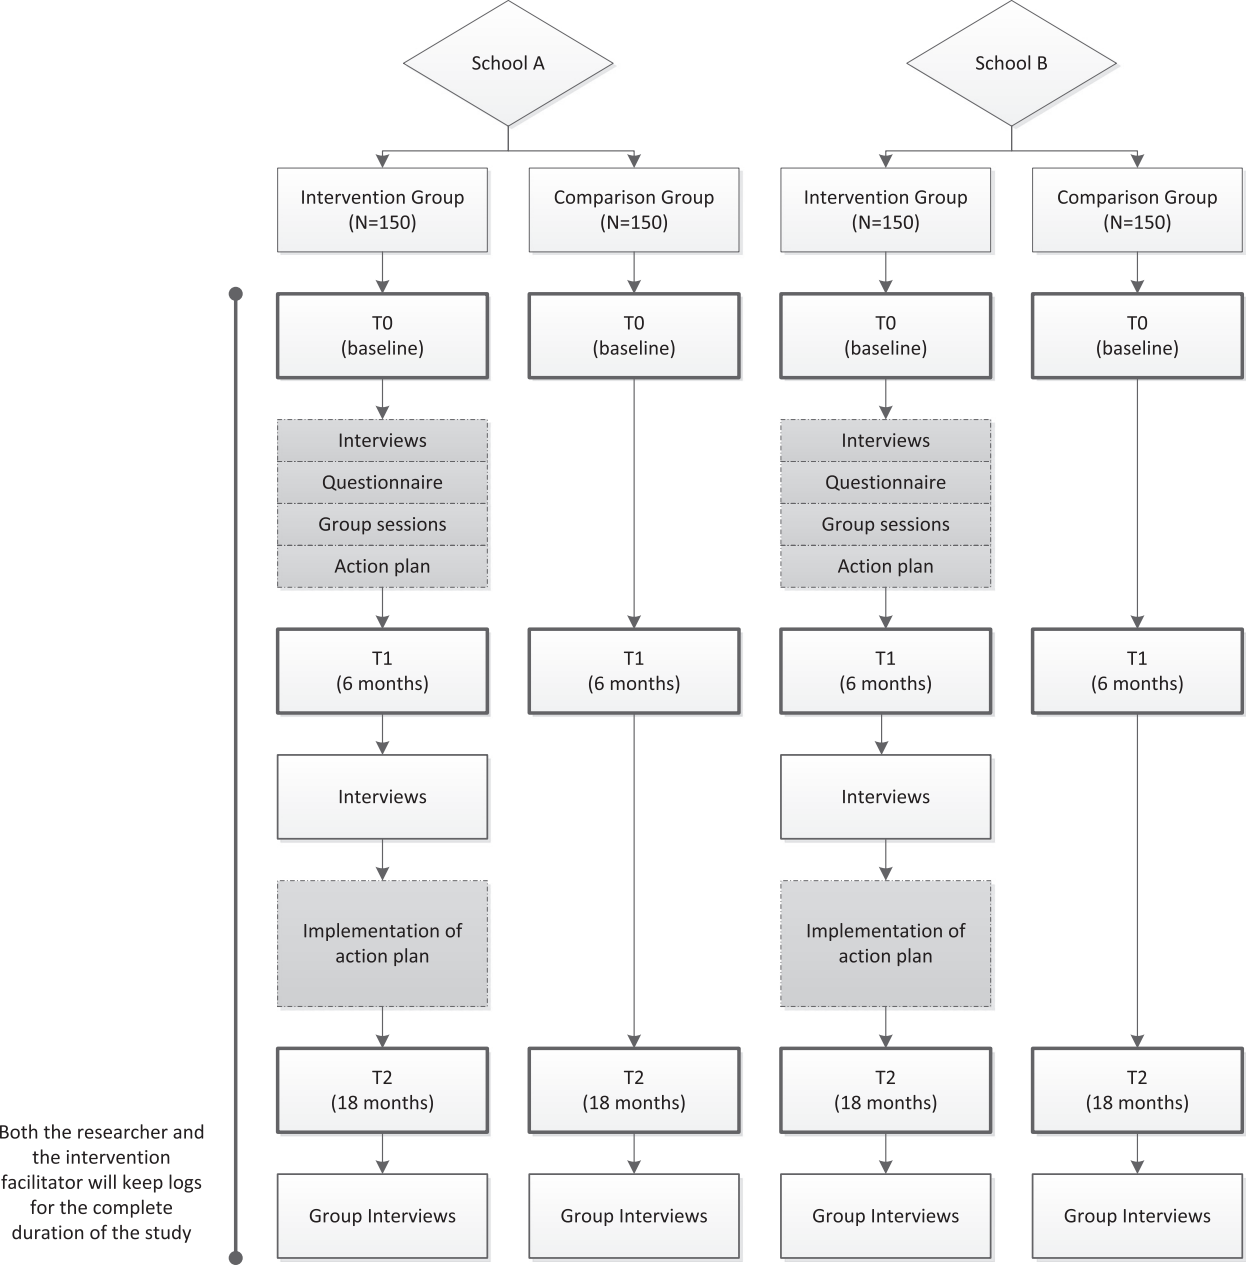

School A

School B

Intervention Group  
(N=150)

Comparison Group  
(N=150)

Intervention Group  
(N=150)

Comparison Group  
(N=150)

T0  
(baseline)

T0  
(baseline)

T0  
(baseline)

T0  
(baseline)

Interviews  
Questionnaire  
Group sessions  
Action plan

Interviews  
Questionnaire  
Group sessions  
Action plan

T1  
(6 months)

T1  
(6 months)

T1  
(6 months)

T1  
(6 months)

Interviews

Interviews

Implementation of  
action plan

Implementation of  
action plan

T2  
(18 months)

T2  
(18 months)

T2  
(18 months)

T2  
(18 months)

Group Interviews

Group Interviews

Group Interviews

Group Interviews

Both the researcher and the intervention facilitator will keep logs for the complete duration of the study
